# Supplementary material
Source: PubMed Central journal article supplement (PMC7486978)
Supplement: NIHMS1626407-supplement-Supplementary_Material.pdf [file NIHMS1626407-supplement-Supplementary_Material.pdf]

Evaluation of an Integrin  $\alpha_v\beta_3$  and Aminopeptidase N Dual-receptor  
Targeting Tracer for Breast Cancer Imaging

*Yongkang Gai<sup>1,2,†</sup>, Yaqun Jiang<sup>1,2,†</sup>, Yu Long<sup>1,2</sup>, Lingyi Sun<sup>3</sup>, Qingyao Liu<sup>1,2</sup>, Chunxia Qin<sup>1,2</sup>,  
Yongxue Zhang<sup>1,2</sup>, Dexing Zeng<sup>3,\*</sup>, Xiaoli Lan<sup>1,2,\*</sup>*

<sup>1</sup>Department of Nuclear Medicine, Union Hospital, Tongji Medical College, Huazhong  
University of Science and Technology, Wuhan 430022, China

<sup>2</sup>Hubei Province Key Laboratory of Molecular Imaging, Wuhan 430022, China

<sup>3</sup>Center for Radiochemistry Research, Department of Diagnostic Radiology, Oregon  
Health & Science University, Portland, OR 97239, United States

<sup>†</sup>Yongkang Gai and Yaqun Jiang contributed equally to this work.

\*Corresponding authors

Xiaoli Lan (M.D, Ph.D)

Department of Nuclear Medicine, Union Hospital, No. 1277 Jiefang Ave, Wuhan, Hubei

Province 430022, China. Tel.: +86-27-83692633; Fax: +86-27-85726282.

E-Mail: LXL730724@hotmail.com

Dexing Zeng (Ph.D)

Center for Radiochemistry Research, Department of Diagnostic Radiology, Oregon

Health & Science University, Portland, OR 97239, United States.

Tel: 503-494-5946; Fax: 503-494-4749 E-Mail: zengd@ohsu.edu

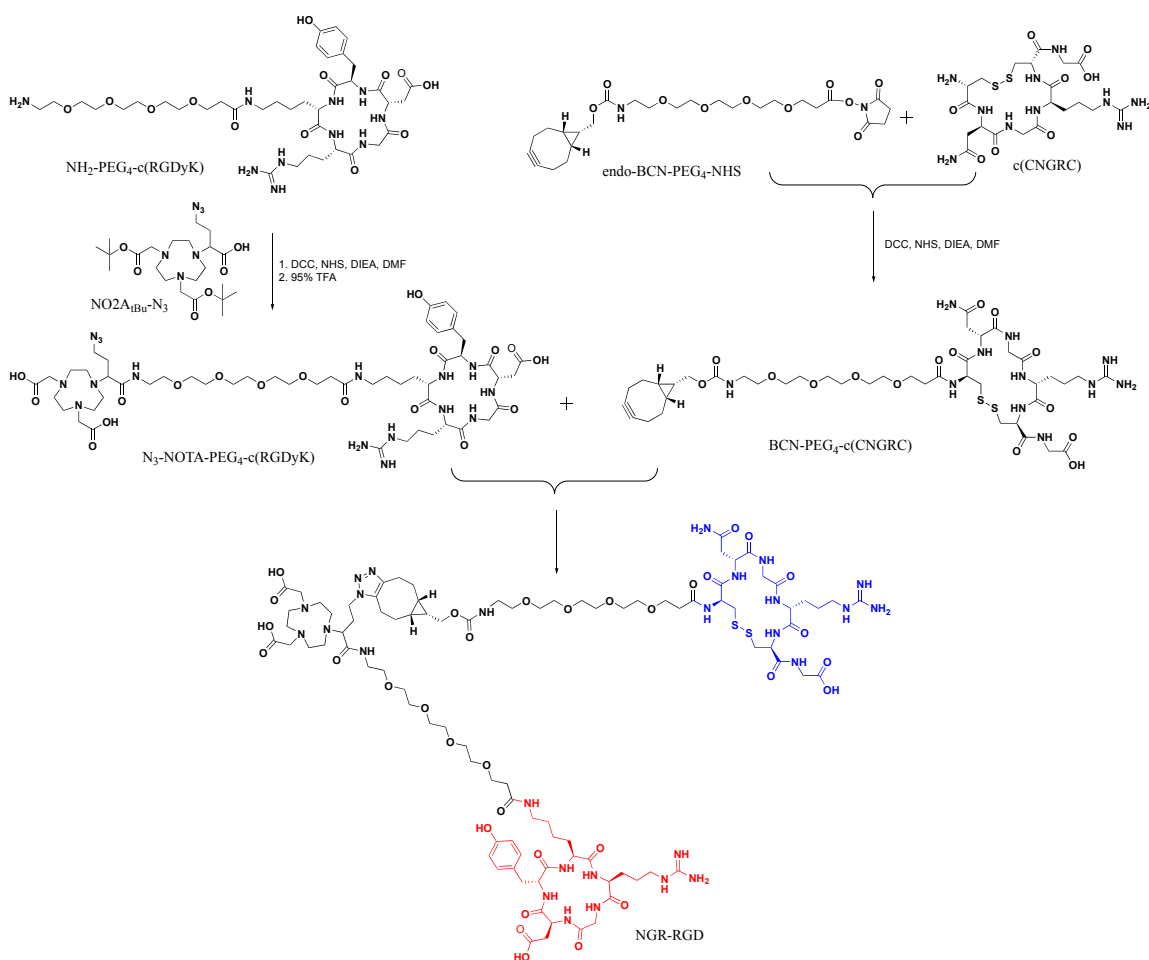

**Scheme S1:** synthetic route for NGR-RGD

### Synthesis of $N_3$ -NOTA-PEG<sub>4</sub>-c(RGDyK)

$N,N'$ -dicyclohexylcarbodiimide (DCC, 2.2 mg) and  $N$ -Hydroxy succinimide (NHS, 1.2 mg) was added to a solution of  $NO_2A_{tBu}-N_3$  in DMF (200  $\mu$ L, 25 mg/mL). After reaction at room temperature for 1 h, the insoluble solid was removed by centrifugation. Peptide  $NH_2$ -PEG<sub>4</sub>-c(RGDyK) (5 mg) and DIEA (10  $\mu$ L) were added to the supernatant and further reacted for 4 h. After HPLC purification and lyophilization,  $N_3$ -NOTA-PEG<sub>4</sub>-c(RGDyK) was obtained as a white solid (3.7 mg, 52%).

### Synthesis of BCN-PEG<sub>4</sub>-c(CNGRC)

Endo-BCN-PEG<sub>4</sub>-NHS (5 mg) and DIEA (10  $\mu$ L) was added to a solution of Cyclic peptide c(CNGRC) (5 mg) in DMF (200  $\mu$ L). The mixture was reacted for 4 h at room temperature.

Pure BCN-PEG<sub>4</sub>-c(CNGRC) was obtained after HPLC purification and lyophilization (4.2 mg, 50%).

**Synthesis of c(RGDyK)-PEG<sub>4</sub>-NOTA-click-PEG<sub>4</sub>-c(CNGRC) (NGR-RGD)**

100  $\mu$ L N<sub>3</sub>-NOTA-PEG<sub>4</sub>-c(RGDyK) in water (10 mg/mL) and 120  $\mu$ L N<sub>3</sub>-NOTA-PEG<sub>4</sub>-c(RGDyK) in water (10 mg/mL) were mixed and reacted for 2 h in room temperature. The reaction was monitored by HPLC. NGR-RGD was obtained after HPLC purification and lyophilization (1.8 mg, 82%). High resolution mass spectrometry (HRMS) (Bruker Solarix 7.0T, Bruker Daltonik, Bremen, Germany): *m/z* calcd for C<sub>94</sub>H<sub>151</sub>N<sub>27</sub>O<sub>33</sub>S<sub>2</sub> [M+2H]<sup>2+</sup> 1126.0283; found 1126.0427.
